# Supplementary material
Source: PubMed Central journal article supplement (PMC3376840)
Supplement: emmm0004-0109-SD1.pdf [file emmm0004-0109-SD1.pdf]

Manuscript EMM-2011-00816

## **Enterocyte STAT5 Promotes Mucosal Wound Healing via Suppression of Myosin Light Chain Kinase-mediated Loss of Barrier Function and Inflammation**

Shila Gilbert, Rongli Zhang, Lee Denson, Richard Moriggl, Kris Steinbrecher, Noah Shroyer, James Lin, and Xiaonan Han

*Corresponding author: Xiaonan Han, Cincinnati Children Hospital Medical Center*

---

### **Review timeline:**

Submission date:  
Accepted:

27 July 2011  
11 November 2011

---

### **Transaction Report:**

No Review Process File is available with this article, as the authors have chosen not to make the review process public in this case.
